# Supplementary material for: In vivo adenine base editing of PCSK9 in macaques reduces LDL cholesterol levels
Source: PubMed Central journal article supplement (PMC8352781; doi:10.1038/s41587-021-00933-4), 2021-05-19
Supplement: 41587_2021_933_MOESM1_ESM.pdf [file 41587_2021_933_MOESM1_ESM.pdf]

---

**Supplementary information**

---

**In vivo adenine base editing of *PCSK9* in macaques reduces LDL cholesterol levels**

---

In the format provided by the authors and unedited

## Supplementary Information:

### ***In vivo* adenine base editing of *PCSK9* in mice and macaques reduces LDL-cholesterol levels**

|                                                                                                                                                        |    |
|--------------------------------------------------------------------------------------------------------------------------------------------------------|----|
| Supplementary Figure 1   Identification of sgRNAs for introducing splice site mutations in murine <i>Pcsk9</i> by adenine base editing.                | 2  |
| Supplemental Figure 2   Adenine base editing with sgRNA-mP01 and sgRNA-hP01 in murine and human liver cell lines leads to the downregulation of PCSK9. | 3  |
| Supplementary Figure 3   AAV-mediated delivery of different ABE variants.                                                                              | 4  |
| Supplementary Figure 4   sgRNA modification patterns and <i>in vivo</i> editing after co-formulation with ABEmax mRNA into LNP and systemic delivery.  | 5  |
| Supplementary Figure 5   A-to-I off-target editing on the transcriptome.                                                                               | 7  |
| Supplementary Figure 6   96-nt profile plot of clonally expanded hepatocytes.                                                                          | 8  |
| Supplementary Figure 7   Detection of potential off-target sites for sgRNA-mP01                                                                        | 10 |
| Supplementary Figure 8   Adenine base editing in Alb-Cre x Trp53 <sup>flx/flx</sup> mice.                                                              | 11 |
| Supplementary Figure 9   Blood samples of macaques were analyzed with a clinical chemistry panel before and during ABE treatment.                      | 12 |
| Supplementary Figure 10   Blood samples of macaques were analyzed with an inflammatory biomarker and cytokine panel before and during ABE treatment.   | 13 |
| Supplementary Figure 11   Detection of potential off-target sites for sgRNA-hP01                                                                       | 14 |
| Supplementary Table 1   Mouse CIRCLE-seq off-target sites analyzed by targeted amplicon sequencing                                                     | 15 |
| Supplementary Table 2   Human CIRCLE-seq off-target sites analyzed by targeted amplicon sequencing                                                     | 15 |
| Supplementary Table 3   Additional mouse sgRNAs tested in this study.                                                                                  | 15 |
| Supplementary Table 4   On-target sequencing of DNA from liver biopsies of treated macaques                                                            | 16 |
| Supplementary Table 5   Sanger and RT-qPCR primers used in this study.                                                                                 | 16 |
| Supplementary Table 6   High throughput (HTS) sequencing primers used in this study                                                                    | 17 |
| Supplementary Table 7   smFISH probe sequences against ABEmax mRNA                                                                                     | 18 |
| Supplementary Note 1   Amino Acid sequences of AAV vectors used in this study                                                                          | 19 |
| Supplementary Note 2   Javascript code for evaluation of the highest A to G conversion within the Protospacer                                          | 20 |
| Supplementary Note 3   Uncropped Western Blot analysis images and PCR Agarose gel images                                                               | 22 |
| Supplementary References                                                                                                                               | 22 |

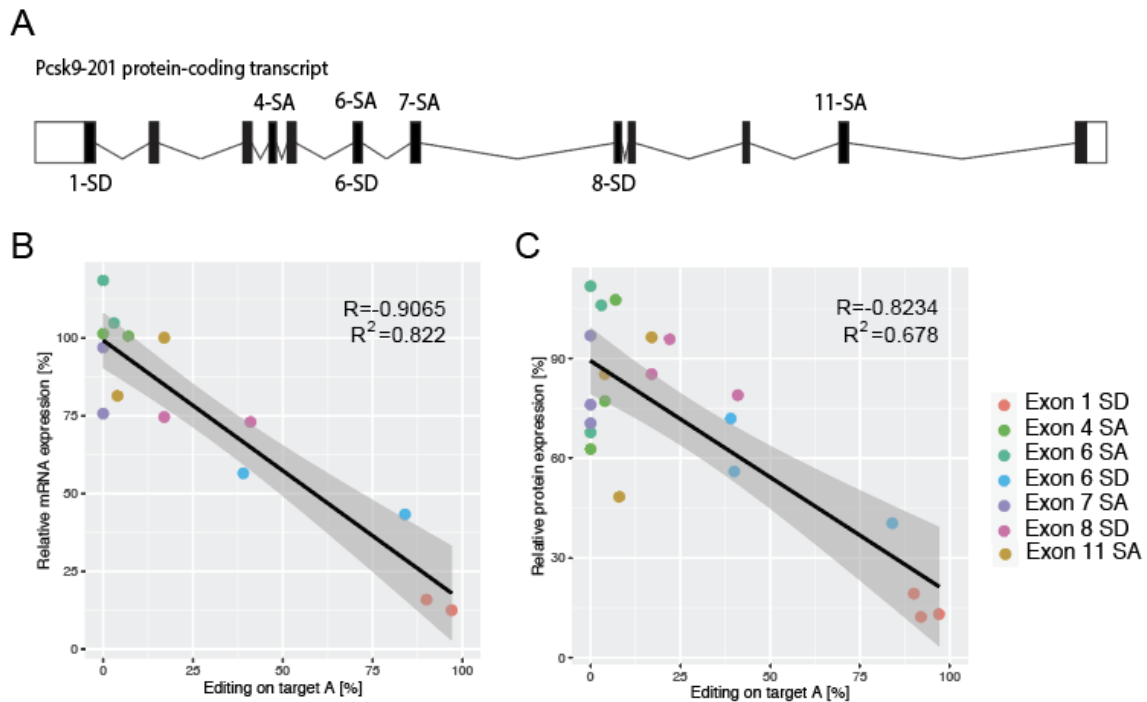

**Supplemental Figure 1 | Identification of sgRNAs for introducing splice site mutations in murine *Pcsk9* by adenine base editing.** (A) Overview of tested sgRNAs at their respective target locus in murine *Pcsk9*. The conserved GT motif at the beginning of an intron – canonical splice-donor (SD) sites– or the conserved AG motif at the end on an intron – splice-acceptor (SA) sites – were targeted. (B) Correlation between target A editing efficiency and *Pcsk9* mRNA levels as determined by RT-qPCR. (C) Correlation between target A editing efficiency and *Pcsk9* protein levels as determined by western blot analysis. Experiments were performed in n=3 independent biological replicates. Shaded areas denote 95% confidence intervals. Hepa1-6 cells upon treatment with the indicated sgRNA. (sgRNA-1-SD = sgRNA-mP01).

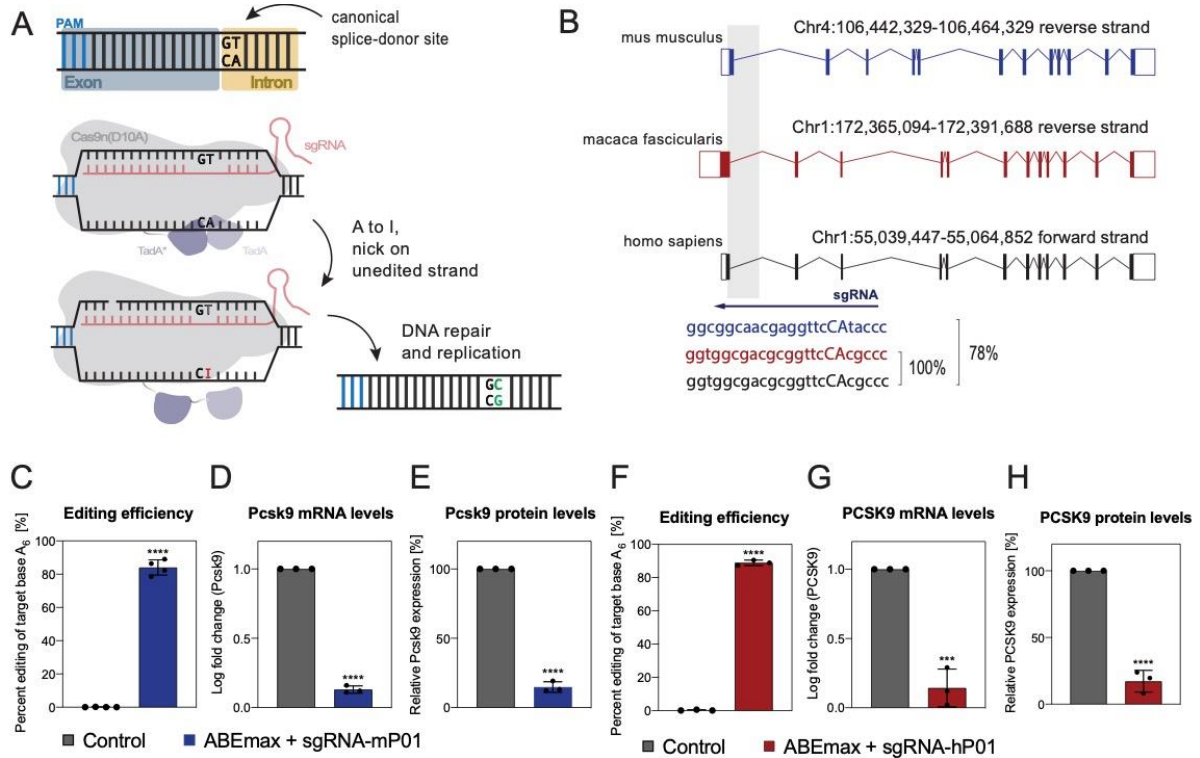

**Supplementary Figure 2 | Adenine base editing with sgRNA-mP01 and sgRNA-hP01 in murine and human liver cell lines leads to the downregulation of PCSK9.** (A) Schematic illustration of the adenine base editing approach for the disruption of the canonical splice-donor site of the first intron of *PCSK9*. The conserved GT motif is converted to GC by an A-to-G nucleotide conversion on the opposing strand. (B) Overview of *PCSK9* orthologs (Mus musculus, Macaca fascicularis, and Homo sapiens). Highlighted is the first splice-donor site of intron 1. The sequences of the reverse-binding sgRNAs for each ortholog is indicated below. Capital letters indicate the reverse complement bases of the targeted splice-donor site. (C) Percent editing in the mouse liver cell line Hepa1-6. Values show percent of A-to-G editing of the targeted adenine at protospacer position 6 (A<sub>6</sub>), counted from the PAM most distal base. Values represent mean  $\pm$  s.d. of n=4 biologically independent experiments. (D) Log fold change of murine *Pcsk9* mRNA as determined by RT-qPCR. Values represent mean  $\pm$  s.d. of n=3 biologically independent experiments. (E) Relative *Pcsk9* protein expression as determined by western blotting. *Pcsk9* protein expression was normalized to the housekeeping gene beta-actin. Values represent mean  $\pm$  s.d. of n=3 biologically independent experiments. (F) Percent editing in the human liver cell line HepG2. Values show percent A to G editing of the targeted adenine at protospacer position 6 (A<sub>6</sub>), counted from the PAM most distal base. Values represent mean  $\pm$  s.d. of n=3 biologically independent experiments. (G) Log fold change of human *PCSK9* mRNA as determined by RT-qPCR. Values represent mean  $\pm$  s.d. of n=3 biologically independent experiments. \*\*\*P=0.0004 (H) Relative *PCSK9* protein expression as determined by ELISA. Values represent mean  $\pm$  s.d. of n=3 biologically independent experiments. Means were compared using two-tailed unpaired t-tests. \*\*\* p<0.001, \*\*\*\* p<0.0001

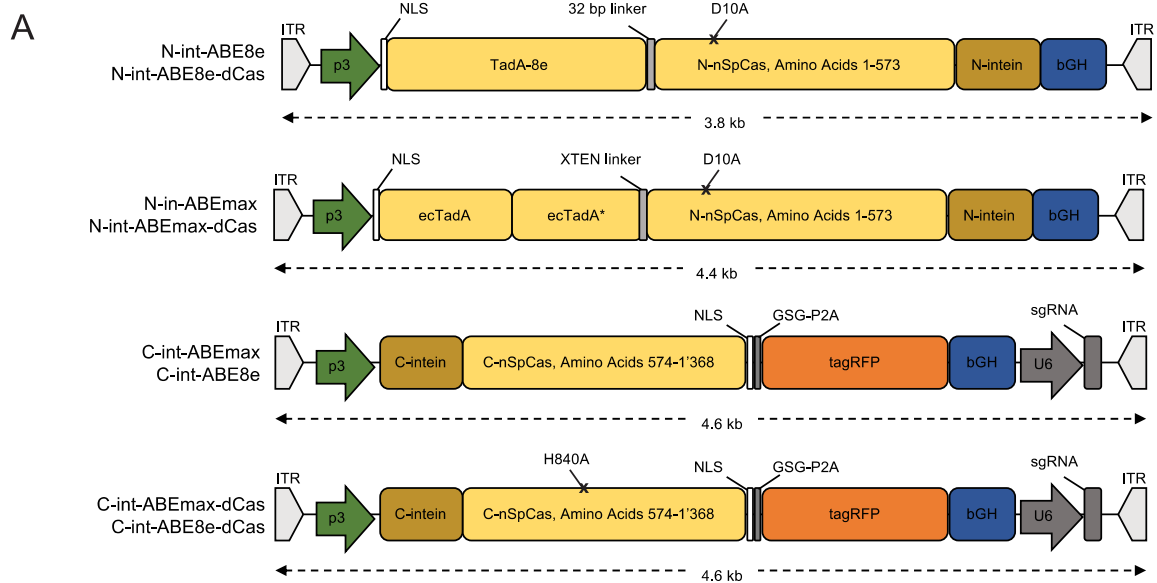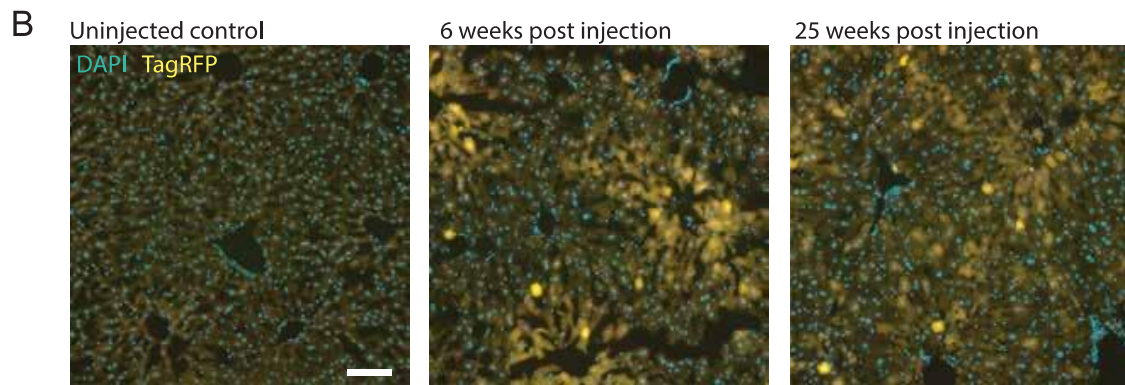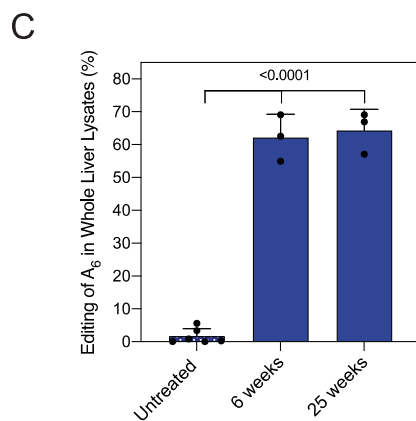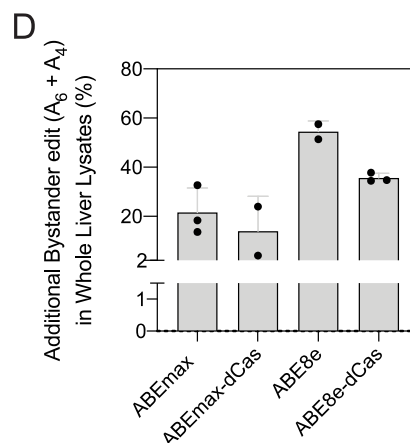

**Supplementary Figure 3 | AAV-mediated delivery of different ABE variants.** (A) Schematic maps of vector genomes packaged into AAV8 capsids. nSpCas9 (D10A mutation), dSpCas9 (D10A mutation and H840A mutation). ITR, internal terminal repeat; NLS, nuclear localization signal; bGH, bovine growth hormone poly(A) signal. (B) Representative cryosection of mouse livers i.v. injected with AAV8 encapsulated N-int-ABE8e + C-int-ABE8e in a 50:50 ratio. Cryosections were imaged from  $n = 3$  animals. 3 pictures per animal were analyzed. Nuclei are stained with DAPI. Red: tagRFP expression. Scale bar, 50  $\mu\text{m}$ . (C) Percent editing of target adenine editing in the protospacer of sgRNA-mP01. Values represent mean  $\pm$  s.d. of  $n=6$ ,  $n=3$ ,  $n=3$  biologically independent experiments. Means were compared using one-way-ANOVA. (D) Percentage of reads from total reads with additional A-to-G editing other than the target adenine (A<sub>6</sub>) after AAV-mediated treatment with different adenine base editor (ABE) variants. Mice were injected with AAV expressing the indicated ABE variant and analyzed after 6 weeks. Values represent mean  $\pm$  s.d. of  $n=3$ ,  $n=2$ ,  $n=2$ ,  $n=3$  biologically independent experiments.

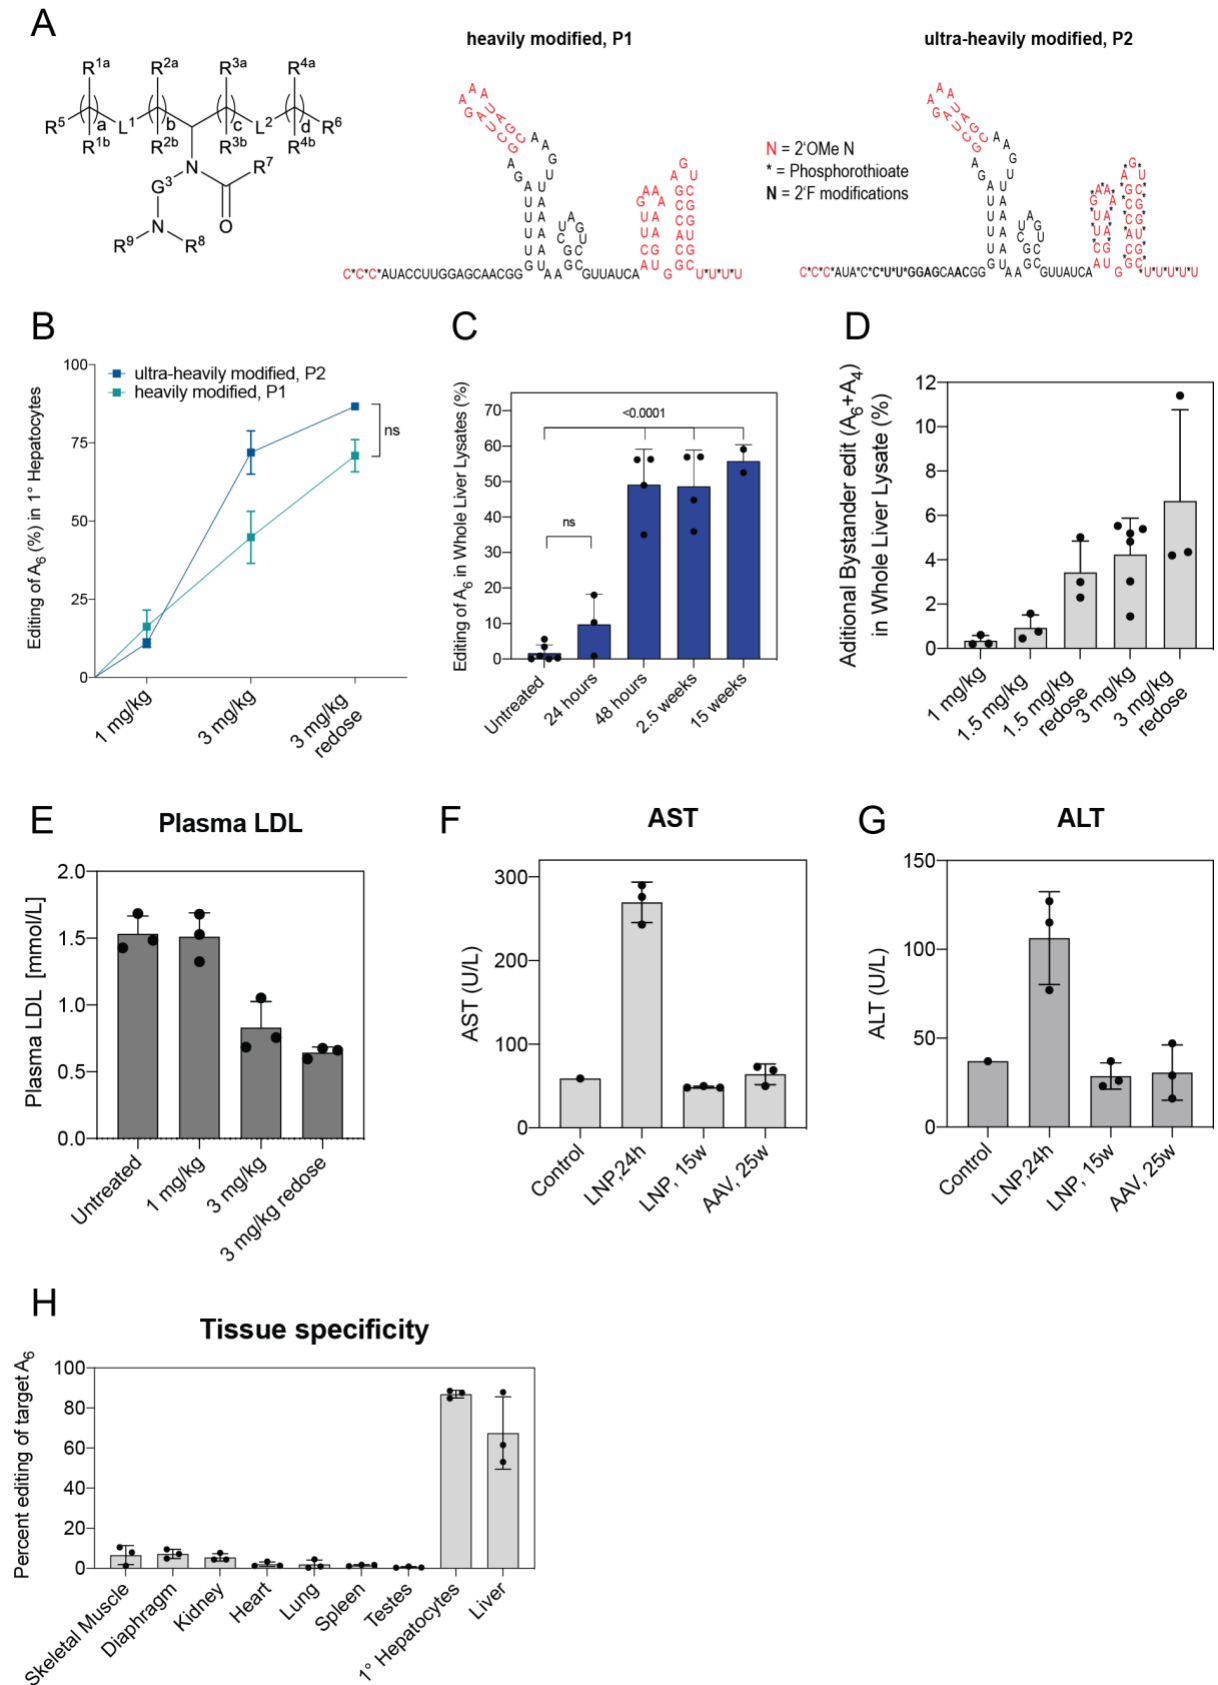

**Supplementary Figure 4 | sgRNA modification patterns and *in vivo* editing after co-formulation with ABEmax mRNA into LNP and systemic delivery.** (A) The left panel depicts the structure of the ionizable lipid. The ionizable lipid used in these studies belongs to the chemical class defined by the structure shown here. The L1 and L2 are each independently  $-O(C=O)$ ,  $(C=O)O$ ; G3 is C1-C6 alkylene; R1a and R4a are, at each occurrence, independently H or C1-C8 alkyl; R1b R2a, R2b R3a R3b R4b are, at each occurrence, H; R5 and R6 are methyl; R7 is C6-C9 alkyl; R8 and R9 are each independently C1 alkyl; or R8 and R9, together with the

nitrogen atom to which they are attached, form a 5-membered heterocyclic ring and a, b, c and d are each independently an integer from 5 to 9. The right panel illustrates the different modification patterns tested for sgRNA\_mP01. 2' O-methyl ribonucleotides (2'OMe N) are indicated in red. 2'fluoro-ribonucleotides are indicated in bold letters. Asterisks indicate phosphorothioate bonds. The modification pattern of sgRNA\_hP01 used in the macaque experiments was identical to the variant P1 of sgRNA\_mP01, and was provided by Synthego. We used the P1 modification pattern for sgRNA\_hP01 as it was more readily obtainable in large quantities and as it is also available in GMP-grade. (B) sgRNAs P1 and P2 were tested in different dosing regimens. No significant difference in editing efficiency was detected. ns, non-significant. Values represent mean  $\pm$  s.d. of n=3 biologically independent experiments. Means were compared using a two-tailed unpaired t-test. (C) Editing efficiencies over time with LNP-encapsulated ABEmax mRNA and sgRNA\_mP01 (variant P2) using a single 3 mg/kg dose over time. Values represent mean  $\pm$  s.d. of n=6, n=3, n=4, n=4, n=2 biologically independent experiments. Means were compared using one-way ANOVA. ns, non-significant (D) Percentage of reads from total reads with additional A-to-G editing other than the target adenine (A<sub>6</sub>) after LNP treatment. Values represent mean  $\pm$  s.d. of n=3 biologically independent experiments. (E) Plasma LDL levels from untreated, 1 mg/kg, 3 mg/kg, and 3 mg/kg redosed C57BL/6J mice. Values represent mean  $\pm$  s.d. of n=3 biologically independent experiments. (F) Plasma aspartate transaminase (AST) levels upon LNP- or AAV-mediated delivery. Values represent mean  $\pm$  s.d. of n=3 biologically independent experiments. (G) Plasma alanine transaminase (AST) levels upon LNP- or AAV-mediated delivery. Values represent mean  $\pm$  s.d. of n=3 biologically independent experiments. (H) Mice were systemically dosed twice at a dose of 3mg/kg. Editing efficiency of the target A was assessed from other tissues by targeted amplicon sequencing. Editing efficiency increased by  $37 \pm 10$  % in isolated primary (1°) hepatocytes compared to whole liver lysates. Values represent mean  $\pm$  s.d. of n=3 biologically independent experiments.

A

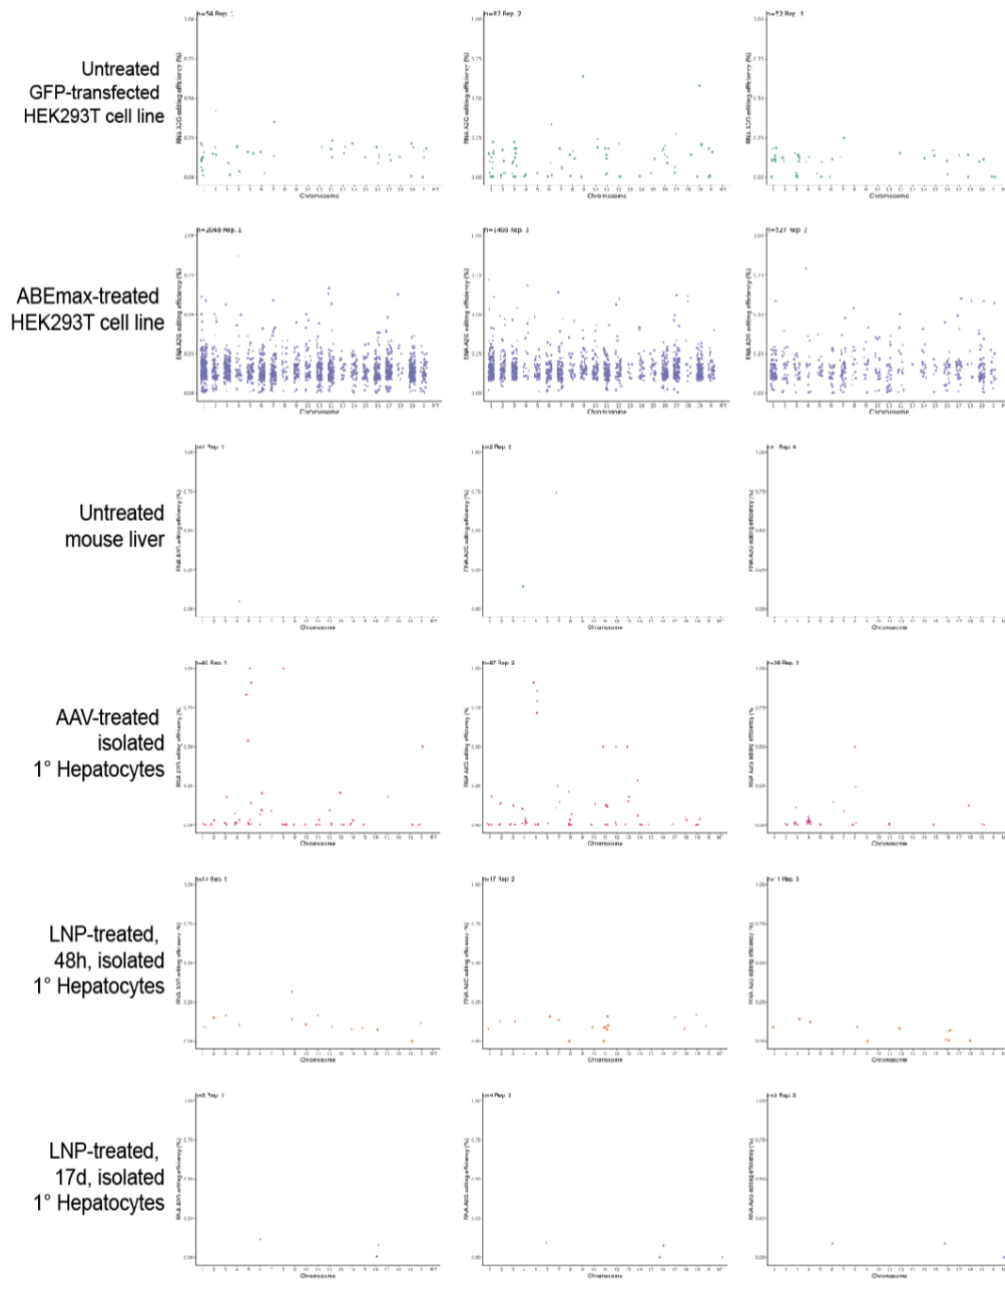

B

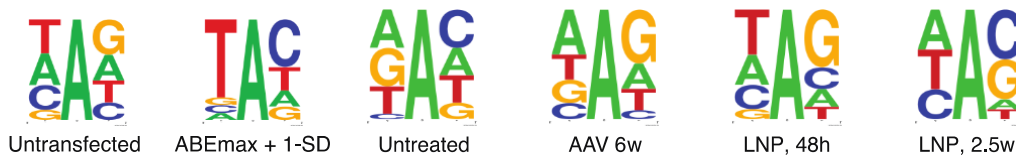

**Supplementary Figure 5 | A-to-I off-target editing on the transcriptome.** (A) Manhattan plots depicting A-to-I editing events on the transcriptome. Each dot represents one editing event. The chromosomal location of each edit is indicated on the x-axis. *In vitro* samples: HEK293T cells transfected with a plasmid expressing GFP (control) or plasmids expressing ABEmax and sgRNA\_hP01. *In vivo* samples: Hepatocytes isolated from untreated mice (control), AAV treated mice, or LNP treated mice. (B) Trinucleotide sequence motifs for A-to-I edited adenosine of samples shown in (A). The height of each letter indicates the relative contribution of each base at this position. Ts should be read as U. As previously shown<sup>1</sup>, the sequence preference of TadA follows a UA consensus motif.



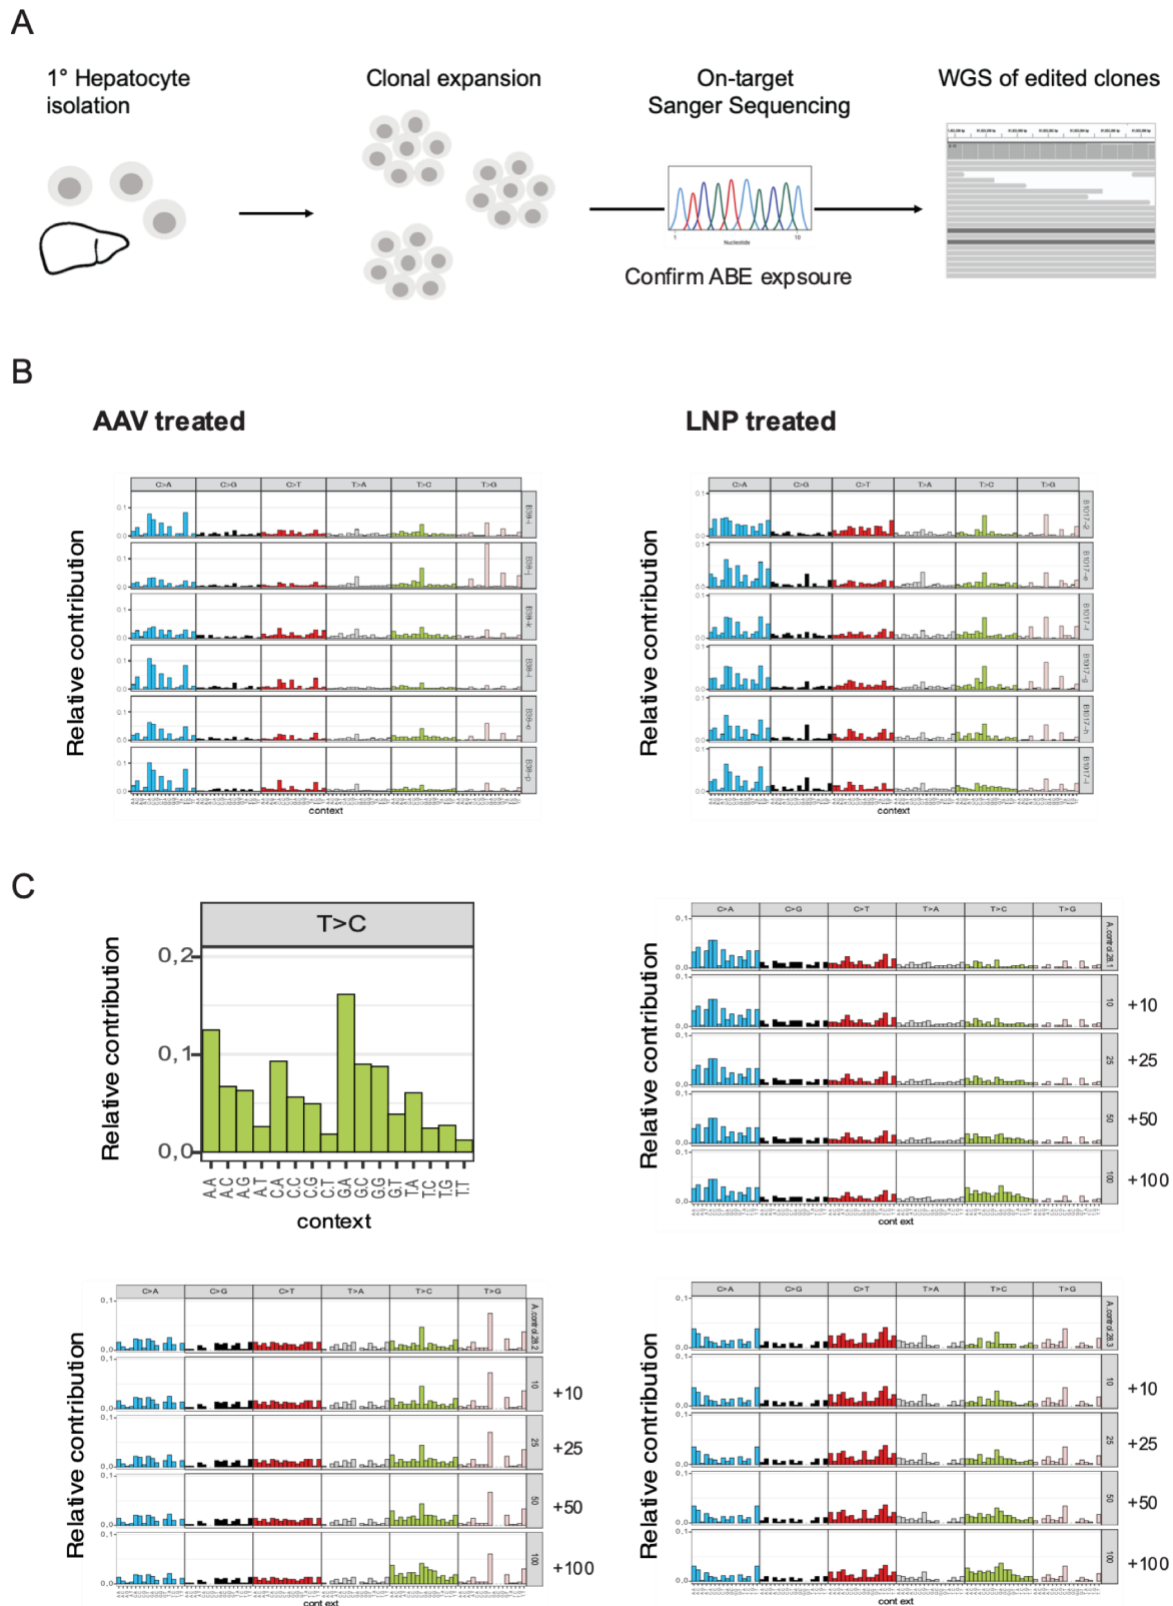

**Supplementary Figure 6 | 96-nt profile plot of clonally expanded hepatocytes.** (A) Schematic illustrating the procedure for assessing sgRNA-independent off-target editing events in an unbiased manner. Primary hepatocytes were isolated and clonally expanded. Only clones with on-target editing and therefore ABE exposure were selected for WGS analysis. (B) The frequency (y-axis) for 96 mutational types (x-axis) is shown. The x-axis shows the 5' and 3' adjacent bases to the respective motif. Each row represents one clone. Mutation types are summarized into one category: C>A includes G>T, C>G includes G>C, C>T includes G>A, T>A includes A>T, T>C includes A>G and T>G includes A>C. (C) The upper left panel shows the trinucleotide motif preference of Tada

determined by Marquart et al.<sup>2</sup>, which was used for computational modelling of TadA signatures. Upper right and lower panels: 96-nt profile plot of control clones (upper row) with in silico added TadA signatures (lower rows). The frequency (y-axis) for 96 mutational types (x-axis) is shown. The numbers on the right indicate the number of SNVs added to the original pattern of control clones.



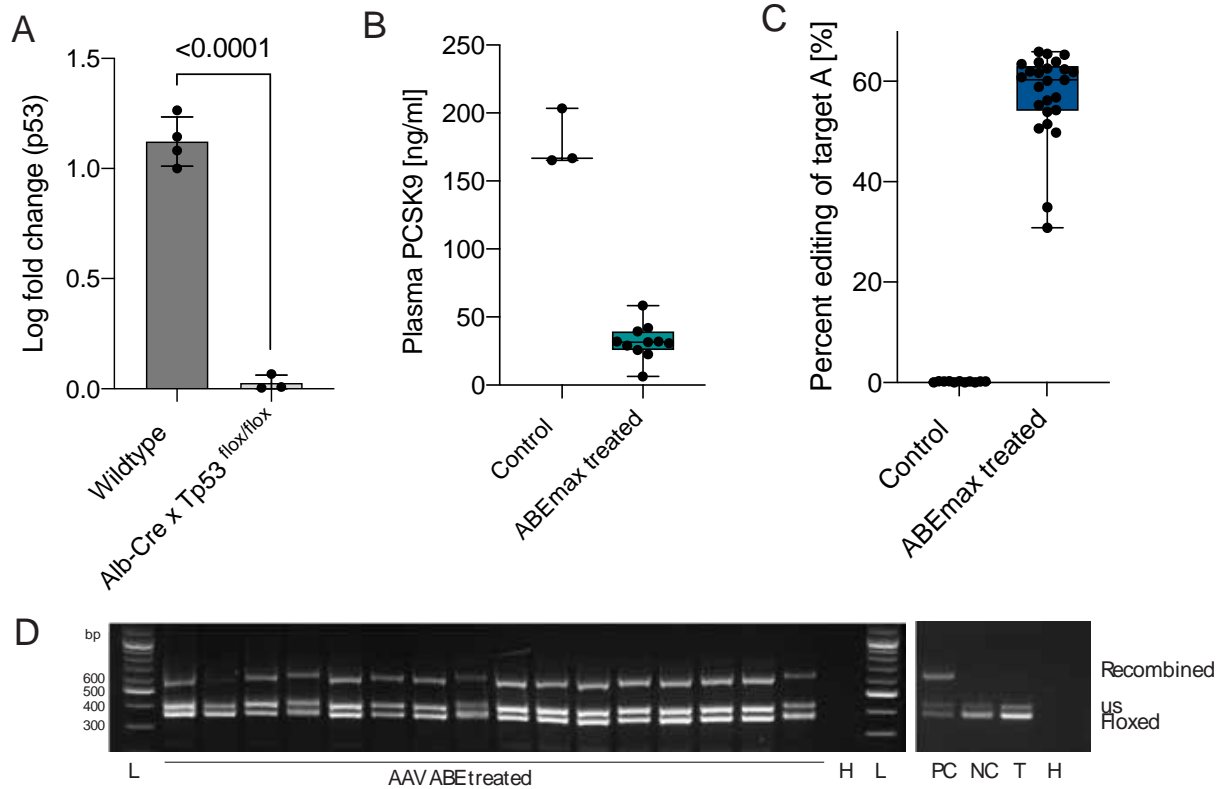

**Supplementary Figure 8 | Adenine base editing in Alb-Cre x Tp53<sup>flox/flox</sup> mice.** (A) Validation of the Tp53 knock-out in the liver. Relative p53 mRNA levels in hepatocytes isolated from Alb-Cre x Tp53<sup>flox/flox</sup> mice compared to Tp53<sup>+/+</sup> control mice as determined by RT-qPCR. Values represent mean  $\pm$  s.d. of n=4, n=3 biologically independent experiments. Means were compared using a two-tailed unpaired t-test. (B) Exposure to ABEmax was confirmed by plasma reduction of PCSK9. Values represent mean  $\pm$  s.d. of n=3, n=11 animals. (C) ABEmax exposure was confirmed in all treated animals by targeted amplicon sequencing. Sequencing was performed on 11 control animals and 25 treated animals. (D) Genotyping PCR validating Tp53<sup>flox/flox</sup> recombination in whole liver lysates of n = 16 ABE treated Alb-Cre x Tp53<sup>flox/flox</sup> mice. A band at 612 bp confirms successful recombination. Floxed Tp53 is confirmed by a band at 370 bp. An unspecific band occurs at around 400 bp. PCR validation was performed once for n=25 animals. L, ladder, H, H<sub>2</sub>O, PC, positive control (recombined mouse liver), NC, negative control (floxed mouse liver without Alb-Cre), T, tail (from Alb-Cre x Tp53<sup>flox/flox</sup> animal). The box plots are standard Tukey plots, in which the centerline represents the median, the lower and upper hinges represent the first and third quartiles, and the whiskers represent  $\pm 1.5$  x the interquartile range.

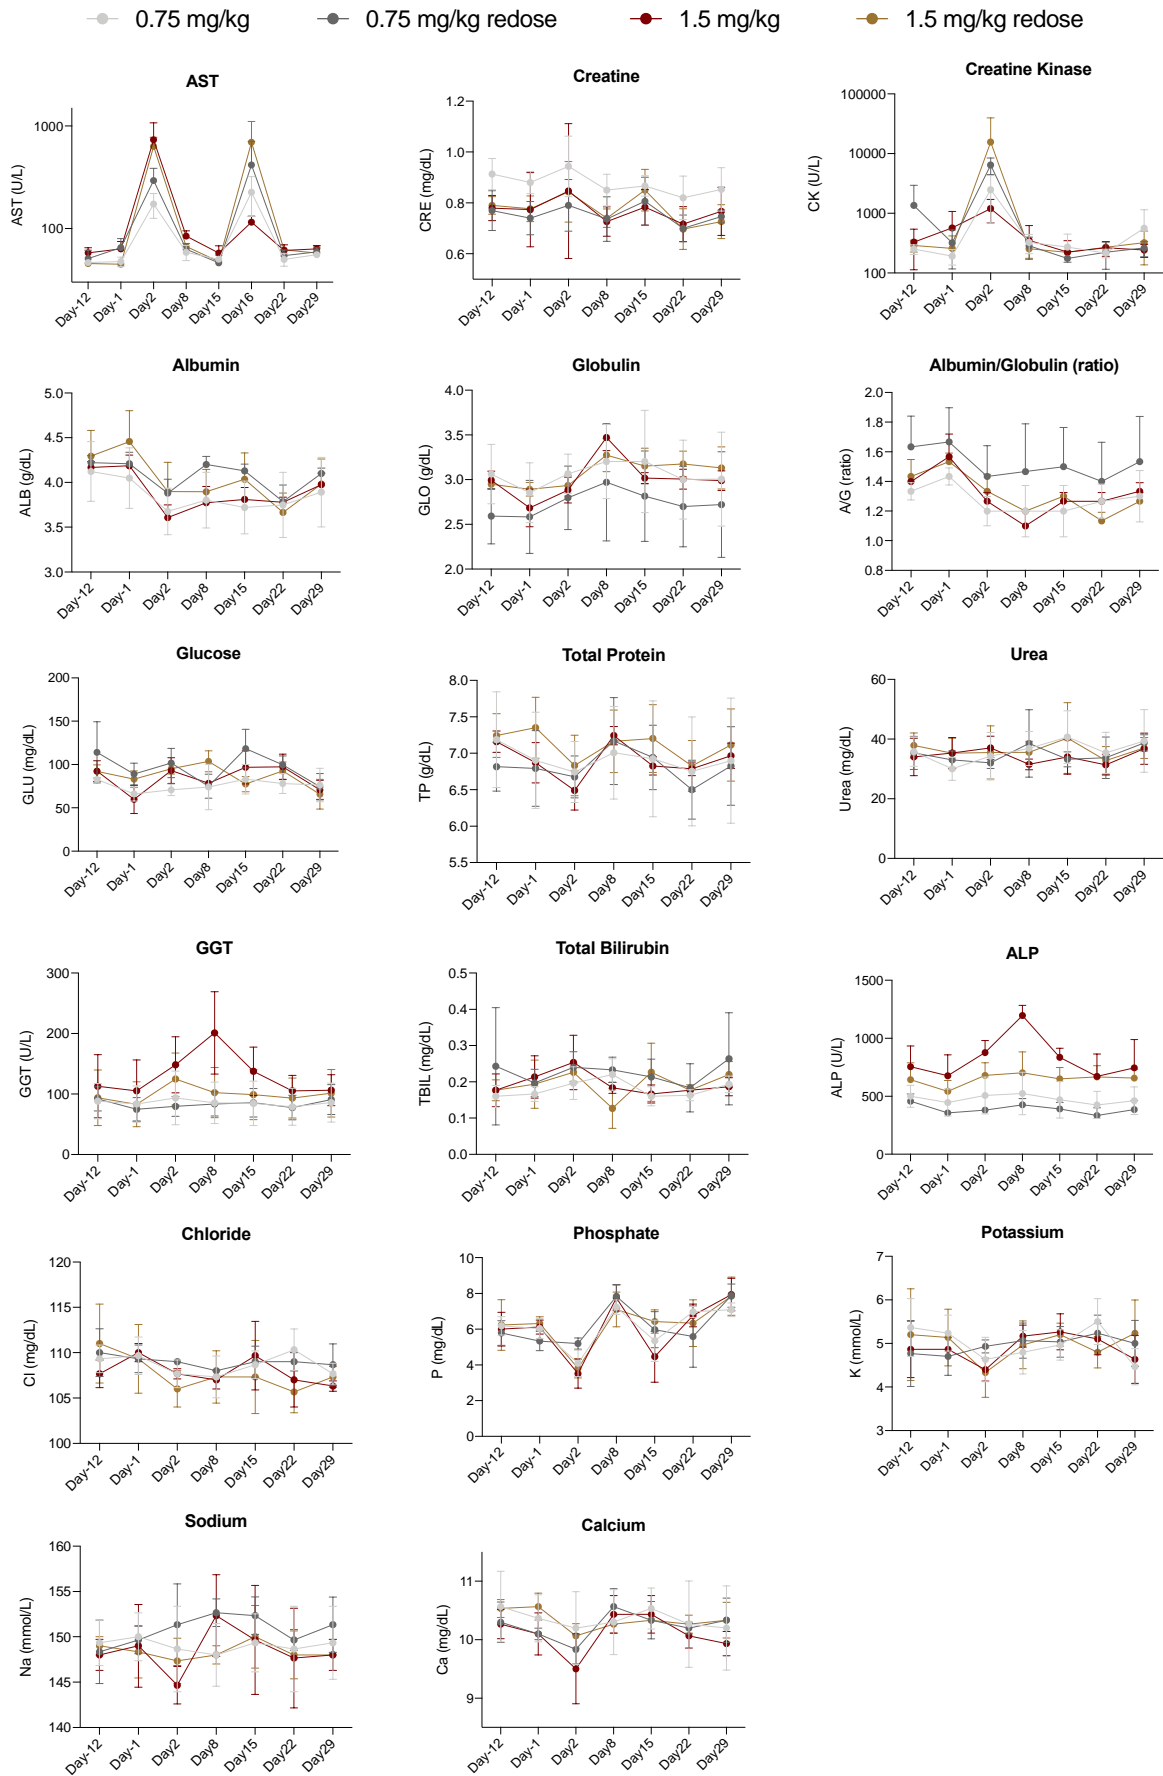

**Supplementary Figure 9 | Blood samples of macaques were analyzed with a clinical chemistry panel before and during ABE treatment.** Values represent mean  $\pm$  s.d. of n=3 biologically independent replicates. Measurement on Day15 was taken before redosing.

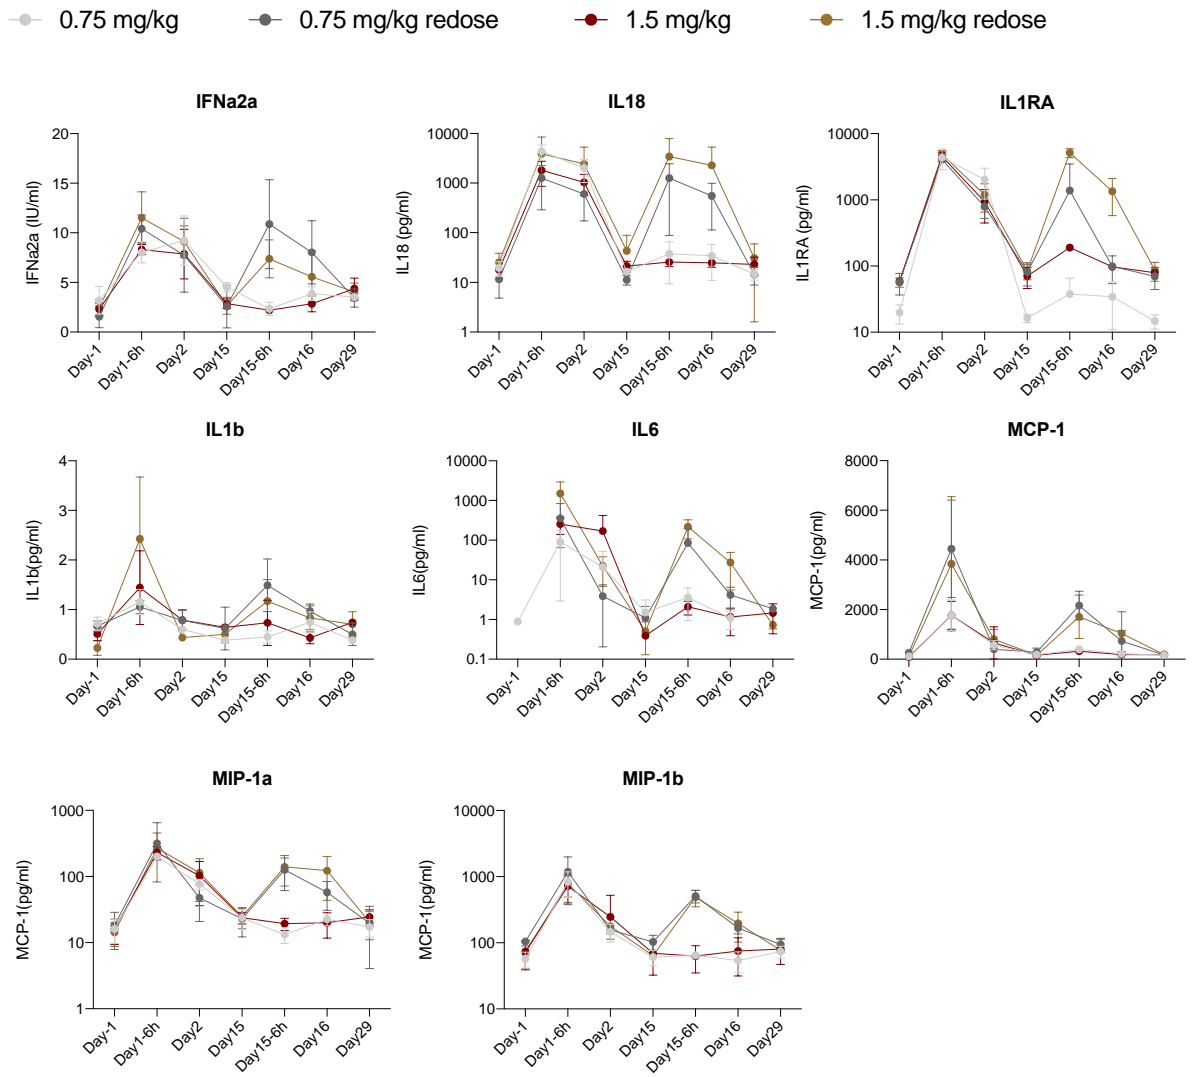

**Supplementary Figure 10 | Blood samples of macaques were analyzed with an inflammatory biomarker and cytokine panel before and during ABE treatment. Values represent mean  $\pm$  s.d. of n=3 biologically independent replicates. Measurement “Day15” was taken before redosing and “Day15-6h” 6 hours after redosing.**

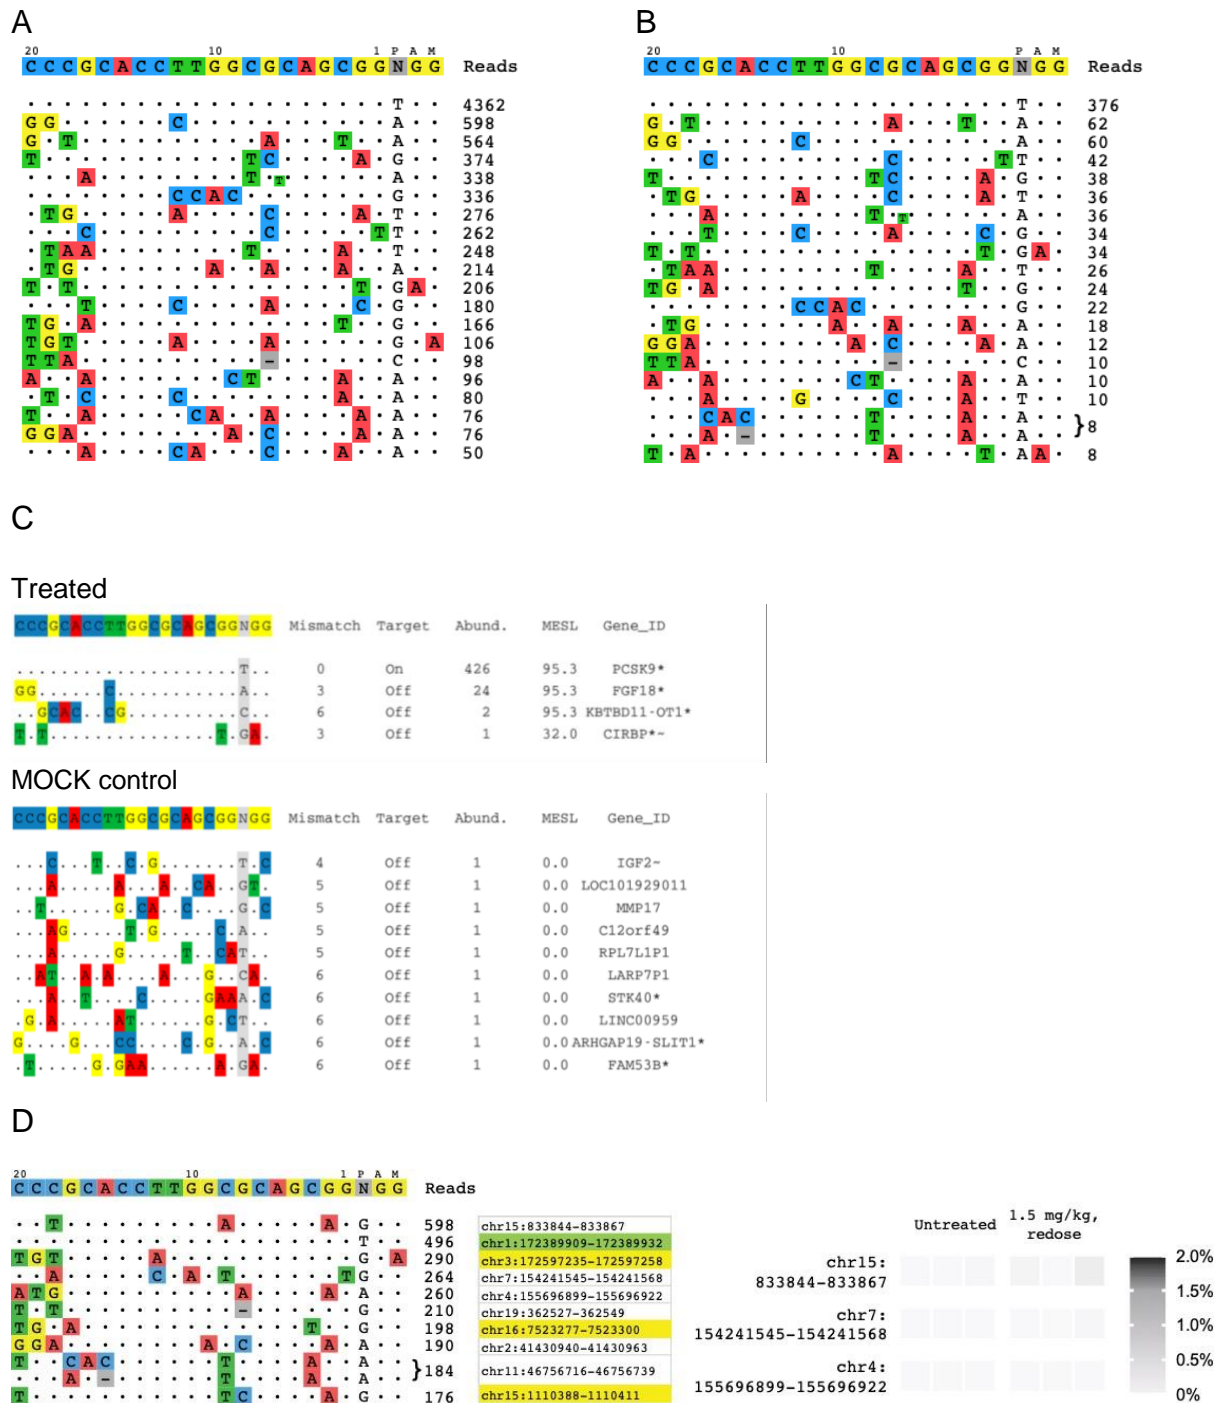

**Supplementary Figure 11 | Unbiased detection of potential sgRNA\_hP01 off-target sites.** (A) Top hits identified by the CIRCLe-seq protocol. (B) Top hits identified by the CHANGE-seq protocol. 9 of the top 10 hits found in CIRCLe-seq were also identified by CHANGE-seq. (C) iGUIDE output from HEK293T cells transfected with sgRNA\_hP01, SpCas9 and ssODN (top panel). Only sites > 2 reads were considered. The only off-target site identified by iGUIDE is also the top hit in CIRCLe-seq. In MOCK controls HEK293T cells only transfected with sgRNA. Only off-target sites where orthologous regions were found in *Macaca fascicularis* (*Macaca\_fascicularis\_5.0/macFas5*, UCSC) were selected for targeted amplicon deep sequencing. (D) Left panel: Identification of candidate off-target sites of sgRNA\_hP01 in the genome of *Macaca fascicularis* by CHANGE-seq. The PCSK9 on-target site is highlighted in green. 3 of the top 10 hits were already identified in the human genome (highlighted in yellow), and analysis of these sites by targeted amplicon sequencing in treated macaques is shown in Fig. 4L. Right panel: Analysis of the top 3 off-target sites specific to the macaque genome. DNA was isolated by targeted amplicon sequencing from liver tissue of LNP-treated macaques (re-dosed with 1.5 mg/kg),

and from blood cells isolated prior to treatment. Values represent the highest A to G conversion frequency within the protospacer. n=3 biological replicates per treatment.

**Supplementary Table 1 | CIRCLE-seq off-target sites for sgRNA\_mP01 analyzed by targeted amplicon sequencing.** Up to 6 mismatches were allowed during CIRCLE-seq analysis. The table shows the coverage of mapped reads to the respective off-target site, the matched sgRNA, and the locus of the protospacer + PAM in the mm10 reference genome.

| Name      | Reads | Matched sgRNA            | locus                   |
|-----------|-------|--------------------------|-------------------------|
| mCIRCLE1  | 78    | CCCCTACCTTGGGGCAACAGTGG  | chr9:58452273-58452296  |
| mCIRCLE2  | 48    | AGCATACCATGGAGCAACACGGT  | chr2:17065083-17065106  |
| mCIRCLE3  | 48    | ACCATACCTAAGAGCAAACCTGGG | chr2:25624134-25624157  |
| mCIRCLE4  | 46    | AGCATACCATGGAGCAACACGGT  | chrX:78047768-78047791  |
| mCIRCLE5  | 40    | CCCATACATTGGGGCATCGGAGG  | chr9:80726885-80726908  |
| mCIRCLE6  | 36    | ACCATACCTTGAACAACCAAGG   | chr12:16844199-16844222 |
| mCIRCLE7  | 36    | TTCATACCTTGGAGCAAGGAGGG  | chr18:67299398-67299421 |
| mCIRCLE8  | 34    | AATGTACCTTGGAGCAACTGGGG  | chr7:73118292-73118315  |
| mCIRCLE9  | 34    | GACATACCTTAAAGCAAAGGAGG  | chr8:27980110-27980133  |
| mCIRCLE10 | 28    | CCCCTACCTTGGGGCAACAG     | chr9:87040451-87040473  |

**Supplementary Table 2 | CIRCLE-seq off-target sites for sgRNA\_hP01 analyzed by targeted amplicon sequencing.** Loci in the human genome and orthologous sites in the genome of *Macaca fascicularis* are indicated. Up to 6 mismatches were allowed for CIRCLE-seq analysis. The table shows the coverage of mapped reads to the respective off-target site, the matched sgRNA, and the locus of the protospacer + PAM in the mm10 reference genome. Mismatches between human and macaque sequences are highlighted in red. Only sites with less or equal 3 mismatches were selected of deep-sequencing.

| No | Reads | sequence human           | sequence ce-macaca                          | MM | locus human              | locus ce-macaca          |
|----|-------|--------------------------|---------------------------------------------|----|--------------------------|--------------------------|
| 1  | 598   | GGCGCACCTTGGCGCAGCGGAGG  | GGCGC <b>GG</b> CCCTGGCGCAG <b>CG</b> GGAGG | 2  | chr5:171451187-171451210 | chrUn_EK146647:1899-1921 |
| 2  | 564   | GCTGCACCTTGGCAGTGGAGG    | GCT <b>A</b> CACCTTGGCAGTGG <b>CAG</b>      | 3  | chr19:50490617-50490640  | chr19:51326546-51326568  |
| 3  | 374   | TCCGCACCTTGGTCCAGCAGGGG  | TCCGCACCTTGGTCCAGCAGGGG                     | 0  | chr9:137167998-137168021 | chr15:1110389-1110411    |
| 4  | 338   | CCCACACCTTGGTGTACGCGGAGG | CCCACA <b>A</b> CTTGGTGTCA <b>GT</b> GGAGG  | 2  | chr3:14242672-14242696   | chr11:86241801-86241824  |
| 5  | 276   | CTGGCACCATGGCCAGCAGTGG   | CTGGCACCATGGCCAGCAGTGG                      | 0  | chr1:25103341-25103364   | chr1:203253892-203253914 |
| 6  | 262   | CCCCACCTTGGCCAGCGTTGG    | CCCC <b>T</b> ACCTTGGCCAGCGTTGG             | 1  | chr19:6431798-6431821    | chr19:6608322-6608344    |
| 7  | 166   | TGCACACCTTGGCGCAGTGGGGG  | TGCACACCTTGGCGCAGTGGGGG                     | 0  | chr17:7462658-7462681    | chr16:7523278-7523300    |
| 8  | 106   | TGTGCACCATGGCACAGCGGGGA  | TGTGCACCATGG <b>CG</b> CAGCGGGGA            | 1  | chr7:139596894-139596917 | chr3:172597236-172597258 |

**Supplementary Table 3 | Additional mouse sgRNAs tested in this study.** Spliceosome-recognition sites with target adenine are underlined. PAM site in blue.

|                                  |                                |                                          |
|----------------------------------|--------------------------------|------------------------------------------|
| mPCSK9-4SA spacer sequence + PAM | <u>ggaagatggaagcagccaggtgg</u> | Spliceosome-recognition site, underlined |
| mPCSK9-6SA spacer sequence + PAM | <u>ttgcagcctggagttattcgg</u>   | Spliceosome-recognition site, underlined |
| mPCSK9-6SD spacer sequence + PAM | <u>cctacctgtggagcagaagctgg</u> | Spliceosome-recognition site, underlined |



|                                   |                                   |                                          |
|-----------------------------------|-----------------------------------|------------------------------------------|
| mPCSK9-7SA spacer sequence + PAM  | tgccagggtcatcacagtctggg           | Spliceosome-recognition site, underlined |
| mPCSK9-8SD spacer sequence + PAM  | ctca <u>cc</u> ctgtctcatgggtgctgg | Spliceosome-recognition site, underlined |
| mPCSK9-11SA spacer sequence + PAM | tctagggtgcagcttcattggg            | Spliceosome-recognition site, underlined |

**Supplementary Table 4 | On-target sequencing of DNA from liver biopsies of treated macaques.** The average editing efficiency per animal is summarized in the very right column.

| Animal ID | Caudate    | Left       | Quadrate_1 | Quadrate_2 | Right_1    | Right_2    | Average    |
|-----------|------------|------------|------------|------------|------------|------------|------------|
| 101       | 1.29670943 | 1.15042058 | 1.39945239 | 1.26750282 | 1.32621705 | 1.13012593 | 1.26173803 |
| 102       | 2.58773485 | 1.87332739 | 1.75054705 | 1.76981542 | 2.27347611 | 2.90997706 | 2.19414631 |
| 103       | 2.64955252 | 3.3873816  | 2.82352941 | 4.29378531 | 1.91238604 | 2.83550546 | 2.98369006 |
| 201       | 2.73238682 | 2.3881661  | 2.22363405 | 2.85744978 | 1.50018752 | 2.20918622 | 2.31850175 |
| 202       | 6.68384142 | 3.97887324 | 6.35316699 | 7.19582851 | 3.56245124 | 4.65335639 | 5.4045863  |
| 203       | 2.88557214 | 2.25580538 | 1.99554393 | 3.56302916 | 2.35669758 | 1.95937628 | 2.50267075 |
| 301       | 13.3949928 | 33.7160296 | 27.2890485 | 18.3094262 | 21.9637273 | 16.3546374 | 21.837977  |
| 302       | 37.1537853 | 29.3938188 | 22.790906  | 31.9125174 | 22.9177391 | 22.8024607 | 27.8285379 |
| 303       | 31.0052382 | 44.3266616 | 32.0111732 | 28.1796311 | 39.2398815 | 26.5566506 | 33.553206  |
| 401       | 19.4481748 | 19.0970275 | 44.3494197 | 18.5862069 | 22.0233902 | 20.847502  | 24.0586202 |
| 402       | 29.3512122 | 25.4981425 | 27.4274662 | 19.4710779 | 16.4604507 | 18.9490135 | 22.8595605 |
| 404       | 20.2874207 | 18.2348651 | 16.2294732 | 31.3399554 | 34.8323516 | 34.3689969 | 25.8821771 |

**Supplementary Table 5 | Sanger and RT-qPCR primers used in this study.** PCR amplification was performed using respective forward (fw) and reverse (rev) primers. Sanger sequencing was performed using the respective in-sequence primer (in\_seq). HKG, housekeeping gene

|                          |                      |                                     |
|--------------------------|----------------------|-------------------------------------|
| hPCSK9_P01_Sanger Fw     | ACTTCAGCTCCTGCACAGTC | Sanger, amplicon primer, human      |
| hPCSK9_P01_Sanger Rev    | ACCTTCCCCTGAATAGCGC  | Sanger, amplicon primer, human      |
| hPCSK9_P01_Sanger in_seq | ACCTGCACTCCACTTCTCTC | Sanger, in-sequence primer, human   |
| NHP_PCSK9_Sanger_FW      | ACTCCAGCTCCTGCACAGTC | Sanger, amplicon primer, macaque    |
| NHP_PCSK9_Sanger_Rev     | GCCTTCCCCTGAATAGCGC  | Sanger, amplicon primer, macaque    |
| NHP_PCSK9_Sanger_in_seq  | CTGATGGGTACCGTCAGCTC | Sanger, in-sequence primer, macaque |
| mPCSK9_P01_Sanger Fw     | CTTGCTCCCCAGAGACATC  | Sanger, amplicon primer, mouse      |
| mPCSK9_P01_Sanger Rev    | CTAAGCTTGGCCCTCGCCTC | Sanger, amplicon primer, mouse      |
| mPCSK9_P01_Sanger in_seq | ACCCACTGCTCTGCGTGGCT | Sanger, in-sequence primer, mouse   |

|                             |                      |                            |
|-----------------------------|----------------------|----------------------------|
| PCSK9_4SA_Sanger Fw         | CATATGTTGGGAGTTGGCT  | Sanger, amplicon primer    |
| PCSK9_4SA_Sanger Rev        | GTACCTCTGCCACCTTAC   | Sanger, amplicon primer    |
| PCSK9_6SA/6SD_Sanger Fw     | AGGTTAAGCATCCGAGACC  | Sanger, amplicon primer    |
| PCSK9_6SA/6SD_Sanger Rev    | AATGCTCAGGGGATTGTGG  | Sanger, amplicon primer    |
| PCSK9_7SA_Sanger Fw         | TACCTAGAACCTGGGCTCC  | Sanger, amplicon primer    |
| PCSK9_7SA_Sanger Rev        | TGTGAGGTCCCCTCTGTGA  | Sanger, amplicon primer    |
| PCSK9_8SD_Sanger Fw         | TGGGTCTACTAGGAAGGAT  | Sanger, amplicon primer    |
| PCSK9_8SD_Sanger Rev        | CACCCGCCAGAGATGTTAGG | Sanger, amplicon primer    |
| PCSK9_11SA_Sanger Fw        | GGGAAGGGACTCAAAGAGGC | Sanger, amplicon primer    |
| PCSK9_11SA_Sanger Rev       | ACCTGAGATCCCATGCTCCT | Sanger, amplicon primer    |
| PCSK9_4SA_Sanger in_seq     | GGGAGATTCCCATGAGCC   | Sanger, in-sequence primer |
| PCSK9_6SA/6SD_Sanger in_seq | TGTGTCTCTGAGGGGAGGAG | Sanger, in-sequence primer |
| PCSK9_7SA_Sanger in_seq     | TGGAGGAGGTGAGATGCAGA | Sanger, in-sequence primer |
| PCSK9_8SD_Sanger in_seq     | CATTGTGGCTCGGATGCTGA | Sanger, in-sequence primer |
| PCSK9_11SA_Sanger in_seq    | AAGAGTTGCATGGCTCTCC  | Sanger, in-sequence primer |

|                           |                               |                                                    |
|---------------------------|-------------------------------|----------------------------------------------------|
| Trp53 Genotyping Primer A | CAC AAA AAC AGG TTA AAC CCA G | Assessment of recombined, wildtype or floxed Trp53 |
| Trp53 Genotyping Primer B | AGC ACA TAG GAG GCA GAG AC    | Assessment of recombined, wildtype or floxed Trp53 |
| Trp53 Genotyping Primer D | GAA GAC AGA AAA GGG GAG GG    | Assessment of recombined, wildtype or floxed Trp53 |
| Cre 351 Fw                | CGA CCA GGT TCG TTC ACT CA    | Assessment of presence of Albumin-Cre              |
| Cre 351 Rev               | CGA GTT GAT AGC TGG CTG GT    | Assessment of presence of Albumin-Cre              |

|                             |                        |                            |
|-----------------------------|------------------------|----------------------------|
| mPCKS9_RT-qPCR Fw           | TATGCCGTCGCGAGATGCTG   | RT-qPCR Primer mouse PCSK9 |
| mPCKS9_RT-qPCR Rev          | TGACGTCTGGACCTCAGC     | RT-qPCR Primer mouse PCSK9 |
| mB2M FW                     | TTCTGGTGCTTGCTCACTGA   | RT-qPCR Primer mouse HKG   |
| mB2M Rev                    | CAGTATGTTGCGCTTCCCATTC | RT-qPCR Primer mouse HKG   |
| hPCSK9_RT-qPCR Fw           | ATCCACGCTTCCTGCTGC     | RT-qPCR Primer human PCSK9 |
| hPCSK9_RT-qPCR Rev          | CACGGTCACCTGCTCCTG     | RT-qPCR Primer human PCSK9 |
| hGAPDH Fw                   | GTCCACTGGCGTGTTCACCA   | RT-qPCR Primer human HKG   |
| hGAPDH Rev                  | GTGGCAGTGATGGCATGGAC   | RT-qPCR Primer human HKG   |
| P53 Exon 4/5-spanning Fw    | CTTCTGCAGTCTGGGACAG    | RT-qPCR Primer mouse p53   |
| Trp53 Exon 4/5-spanning Rev | TCTCAGACCTCCGTCATGT    | RT-qPCR Primer mouse p53   |

### Supplementary Table 6 | High throughput (HTS) sequencing primers used in this study

|                   |                                                        |                                            |
|-------------------|--------------------------------------------------------|--------------------------------------------|
| mPCSK9_HTS_Fw     | CTTCCCTACACGACGCTCTCCGATCTNNNNNNCTCCCGTCCCAGGAGGAT     | HTS for on-target mus musculus gDNA        |
| mPCSK9_HTS_Rev    | GGAGTTCAGACGTGTGCTCTCCGATCTNNNNNNCGGCTAGATGAGCAGAGAAGA | HTS for on-target mus musculus gDNA        |
| NHP_PCSK9_HTS_Fw  | CTTCCCTACACGACGCTCTCCGATCTACCTGCACCCCACTTCTCTCTC       | HTS for on-target macaca fascicularis gDNA |
| NHP_PCSK9_HTS_Rev | GGAGTTCAGACGTGTGCTCTCCGATCTCGTTCCGAGGAGGACGGC          | HTS for on-target macaca fascicularis gDNA |
| hPCSK9_HTS_Fw     | CTTCCCTACACGACGCTCTCCGATCTNNNNNNAACCACACGCCACCTCCAC    | HTS for on-target homo sapiens gDNA        |
| hPCSK9_HTS_Rev    | GGAGTTCAGACGTGTGCTCTCCGATCTNNNNNNAAACTGAGGCCCGAGAGG    | HTS for on-target homo sapiens gDNA        |

|               |                                                     |                                                 |
|---------------|-----------------------------------------------------|-------------------------------------------------|
| mCIRCLE1 Fw   | CTTCCCTACACGACGCTCTCCGATCTATGTCACCTTCTGCACACCAAGA   | HTS for off-target site chr9:58452273-58452296  |
| mCIRCLE1 Rev  | GGAGTTCAGACGTGTGCTCTCCGATCTCTCCAGGAGAATCTGTCAC      | HTS for off-target site chr9:58452273-58452296  |
| mCIRCLE2 Fw   | CTTCCCTACACGACGCTCTCCGATCTAGTGCCTAGGCGTAAATCTC      | HTS for off-target site chr2:17065083-17065106  |
| mCIRCLE2 Rev  | GGAGTTCAGACGTGTGCTCTCCGATCTCAGAGAGACCTCAAGATAGC     | HTS for off-target site chr2:17065083-17065106  |
| mCIRCLE3 Fw   | CTTCCCTACACGACGCTCTCCGATCTCCAAGGATGGCTCTCAGCAA      | HTS for off-target site chr2:25624134-25624157  |
| mCIRCLE3 Rev  | GGAGTTCAGACGTGTGCTCTCCGATCTGATGCTCACACTGGGCAGAA     | HTS for off-target site chr2:25624134-25624157  |
| mCIRCLE4 Fw   | CTTCCCTACACGACGCTCTCCGATCTTCTAACTTGTCCACGAGGC       | HTS for off-target site chrX:78047768-78047791  |
| mCIRCLE4 Rev  | GGAGTTCAGACGTGTGCTCTCCGATCTGGCACAATGGGGTCTTAACA     | HTS for off-target site chrX:78047768-78047791  |
| mCIRCLE5 Fw   | CTTCCCTACACGACGCTCTCCGATCTAGAGATGGTTGGGAAGCAC       | HTS for off-target site chr9:80726885-80726908  |
| mCIRCLE5 Rev  | GGAGTTCAGACGTGTGCTCTCCGATCTCCATACATTGGGGCATCGGA     | HTS for off-target site chr9:80726885-80726908  |
| mCIRCLE6 Fw   | CTTCCCTACACGACGCTCTCCGATCTTCTACAGGAGGCTCTGGCT       | HTS for off-target site chr12:16844199-16844222 |
| mCIRCLE6 Rev  | GGAGTTCAGACGTGTGCTCTCCGATCTTCCAGGACAGTCAGGGCTA      | HTS for off-target site chr12:16844199-16844222 |
| mCIRCLE7 Fw   | CTTCCCTACACGACGCTCTCCGATCTAGGTGACTTGCTTCTCTGTGT     | HTS for off-target site chr18:67299398-67299421 |
| mCIRCLE7 Rev  | GGAGTTCAGACGTGTGCTCTCCGATCTGACATCTGGCCACTGGTGTG     | HTS for off-target site chr18:67299398-67299421 |
| mCIRCLE8 Fw   | CTTCCCTACACGACGCTCTCCGATCTATGAGACACTCTAGCCCTTCAG    | HTS for off-target site chr7:73118292-73118315  |
| mCIRCLE8 Rev  | GGAGTTCAGACGTGTGCTCTCCGATCTATACCTACACTTCTCAAGCCAC   | HTS for off-target site chr7:73118292-73118315  |
| mCIRCLE9 Fw   | CTTCCCTACACGACGCTCTCCGATCTAGTTGTTGTTCAACTTAAAGGACA  | HTS for off-target site chr8:27980110-27980133  |
| mCIRCLE9 Rev  | GGAGTTCAGACGTGTGCTCTCCGATCTTCCCTTGGCCACTGTCAATATCTT | HTS for off-target site chr8:27980110-27980133  |
| mCIRCLE10 Fw  | CTTCCCTACACGACGCTCTCCGATCTGCTTCCCAAGGCCAAATGTC      | HTS for off-target site chr9:87040451-87040473  |
| mCIRCLE10 Rev | GGAGTTCAGACGTGTGCTCTCCGATCTATAACGTTTGGGGTTGTGC      | HTS for off-target site chr9:87040451-87040473  |

|              |                                                  |                                                                           |
|--------------|--------------------------------------------------|---------------------------------------------------------------------------|
| hCIRCLE1 Fw  | CTTCCCTACACGACGCTCTCCGATCTCGCCCTCTCCCCTCATT      | HTS for off-target site chr5:171451187-171451210/chrUn_EK146647:1899-1921 |
| hCIRCLE1 Rev | GGAGTTCAGACGTGTGCTCTCCGATCTGACAGGAGGCTGGCAAGG    | HTS for off-target site chr5:171451187-171451210/chrUn_EK146647:1899-1921 |
| hCIRCLE2 Fw  | CTTCCCTACACGACGCTCTCCGATCTTCCAGTCTTTCTCCCAGG     | HTS for off-target site chr19:50490617-50490640/chr19:51326546-51326568   |
| hCIRCLE2 Rev | GGAGTTCAGACGTGTGCTCTCCGATCTAAGGATGTCAGGGACTAGGC  | HTS for off-target site chr19:50490617-50490640/chr19:51326546-51326568   |
| hCIRCLE3 Fw  | CTTCCCTACACGACGCTCTCCGATCTGACTCAGCTCTGCCCGTC     | HTS for off-target site chr9:137167998-137168021/chr15:1110389-1110411    |
| hCIRCLE3 Rev | GGAGTTCAGACGTGTGCTCTCCGATCTGATGGTCTGTGCTCG       | HTS for off-target site chr9:137167998-137168021/chr15:1110389-1110411    |
| hCIRCLE4 Fw  | CTTCCCTACACGACGCTCTCCGATCTTAGAAGTCCAGGTTCCAC     | HTS for off-target site chr3:14242672-14242696/chr11:86241801-86241824    |
| hCIRCLE4 Rev | GGAGTTCAGACGTGTGCTCTCCGATCTAAACTGTCAGTGAAGTCTGCT | HTS for off-target site chr3:14242672-14242696/chr11:86241801-86241824    |
| hCIRCLE5 Fw  | CTTCCCTACACGACGCTCTCCGATCTGGTTCTCAAGCAAGGCTGTC   | HTS for off-target site chr1:25103341-25103364/chr1:203253892-203253914   |
| hCIRCLE5 Rev | GGAGTTCAGACGTGTGCTCTCCGATCTGCTCGTGGAAAGTGGAG     | HTS for off-target site chr1:25103341-25103364/chr1:203253892-203253914   |
| hCIRCLE6 Fw  | CTTCCCTACACGACGCTCTCCGATCTGCATTAGAGGCATGAGCCAC   | HTS for off-target site chr19:6431798-6431821/chr19:6608322-6608344       |
| hCIRCLE6 Rev | GGAGTTCAGACGTGTGCTCTCCGATCTGGAGTTGGCTCTCTGGA     | HTS for off-target site chr19:6431798-6431821/chr19:6608322-6608344       |
| hCIRCLE7 Fw  | CTTCCCTACACGACGCTCTCCGATCTGCTGCCCTTGAATAGGCAA    | HTS for off-target site chr17:7462658-7462681/chr16:7523278-7523300       |
| hCIRCLE7 Rev | GGAGTTCAGACGTGTGCTCTCCGATCTCCTCCACCCGCTTACCTG    | HTS for off-target site chr17:7462658-7462681/chr16:7523278-7523300       |
| hCIRCLE8 Fw  | CTTCCCTACACGACGCTCTCCGATCTGGAATGACAATTGTCTGCCG   | HTS for off-target site chr7:139596894-139596917/chr3:172597236-172597258 |
| hCIRCLE8 Rev | GGAGTTCAGACGTGTGCTCTCCGATCTGAGGTGCTCCTCTCAGGC    | HTS for off-target site chr7:139596894-139596917/chr3:172597236-172597258 |

|                  |                                                  |                                                  |
|------------------|--------------------------------------------------|--------------------------------------------------|
| NHP_CHANGE_1 Fw  | CTTCCCTACACGACGCTCTCCGATCTGATGCAGATGGGGTACCAA    | HTS for off-target site chr15:833844-833867      |
| NHP_CHANGE_1 Rev | GGAGTTCAGACGTGTGCTCTCCGATCTCCAGTTTCAGATGCCAGG    | HTS for off-target site chr15:833844-833867      |
| NHP_CHANGE_2 Fw  | CTTCCCTACACGACGCTCTCCGATCTCCTCCAGCAACAGCTCTCTAAA | HTS for off-target site chr7:154241545-154241568 |
| NHP_CHANGE_2 Rev | GGAGTTCAGACGTGTGCTCTCCGATCTCATTGTAGCAGAGGACGGTGT | HTS for off-target site chr7:154241545-154241568 |
| NHP_CHANGE_3 Fw  | CTTCCCTACACGACGCTCTCCGATCTCCAGGGAGGCCTGGGT       | HTS for off-target site chr4:155696899-155696922 |
| NHP_CHANGE_3 Rev | GGAGTTCAGACGTGTGCTCTCCGATCTCGTTGGACGGGGCGG       | HTS for off-target site chr4:155696899-155696922 |

### Supplementary Table 7 | smFISH probe sequences against ABEmax mRNA

|                       |                      |                      |                      |
|-----------------------|----------------------|----------------------|----------------------|
| tcttgggactcgaactcg    | agctggatgaacagctgtgc | tcactttgtcgtcgaacagg | tacacgaactcgttccag   |
| catccaataactcgtggctaa | agaaacaggtcggctactg  | catgaagtctgtggcga    | ctcgttctttcacgatata  |
| cgatcactctattgtgtgc   | tcgtcgtatcttctgatcat | agattggcaatgtctcgtg  | caggatagactcttctcga  |
| atcgatcaggcggtaaltct  | tcttgtactctcagcag    | ccatttcgatcacgatgttc | ttctggcgatcagcttctc  |
| cataaattcggcatgggctg  | ttcttgcctggcgaagaa   | cgataggtccacatcgtag  | cactctcagtttctggac   |
| caaggctcgaatgtcacgta  | tgggtaaaaatctcctgcc  | atggagtcgtcctcagaaa  | tcgatgggattctctcgaa  |
| cgatcctagatggatcatg   | cttatcgaagtggctatcc  | gtcgaacttctcgtggtaa  | acttaggcagctgtgatgac |
| aatctgacgcggtgattca   | cacggtagaactcgtgata  | cgtcgtacttagtctcctc  | agttcacatattggaggcc  |
| attgaacacctgtctaggca  | tattcactttgtcagctc   | ttcagggtgatcactttcac | tgatctgctgatgactcgt  |
| cacctgaattctgtctgg    | tcagcagatcgtgtatgtg  | aaatcctccgaaatcgga   | ggatcactctctggagaac  |
| gctgaagatctctgcagat   | gaagtcctgtcctgataa   | gatctcgcgactttgataa  | ccagattggcagggtgaaac |
| agctgtggaagaactgtc    | atatctccagaatgtcctc  | agggtacttttgcaggg    | caaagacttgaagcggca   |



Supplementary Note 1 | Amino Acid sequences of AAV vectors used in this study

|                                                                                                                                                                                                                                                                                                                                                                                                                                                                                                                                                                                                                                                                                                                                                                                                                                                                                                                                                                                                                                                                                                                                                                                                                                                                                                         |
|---------------------------------------------------------------------------------------------------------------------------------------------------------------------------------------------------------------------------------------------------------------------------------------------------------------------------------------------------------------------------------------------------------------------------------------------------------------------------------------------------------------------------------------------------------------------------------------------------------------------------------------------------------------------------------------------------------------------------------------------------------------------------------------------------------------------------------------------------------------------------------------------------------------------------------------------------------------------------------------------------------------------------------------------------------------------------------------------------------------------------------------------------------------------------------------------------------------------------------------------------------------------------------------------------------|
| <p><b>N-int-ABEmax/-dCas:</b> NLS - TadA-TadA* - linker - N-term-nCas9 - DnaE Npu N-intein</p> <p>MKRTADGSEFESPKKKRKVSEVEFSHEYWMRHALTLAKRAWDEREVPVGA VLVHNNRVIGEGWNRPIGRHDPTAHAEIMALRQGGLV<br/> MQNYRLIDATLYVTLEPCVMCAGAMIHSRIGRVVFGARDAKTGAAGSLMDVLHHPGMNHRVEITEGILADECAALLSDFRMRQEIKA<br/> QKKAQSSTDSSGSSGGSSGSETPGTSESATPESSGGSSGSSSEVEFSHEYWMRHALTLAKRARDEREVPVGA VLVHNNRVIGEGWNRPIGR<br/> LHDPTAHAEIMALRQGGLVMQNYRLIDATLYVTLEPCVMCAGAMIHSRIGRVVFGVNRNAKTGAAGSLMDVLHHPGMNHRVEITEGILADECA<br/> ALLCYFFRMPRQVFNAQKKAQSSTDSSGSSGGSSGSETPGTSESATPESSGGSSGSSDKKYSIGLDIGTNSVGWAVITDEYKVPKSKF<br/> KVLGNTDRHSIKKNLIGALLFDSGETAEATRLKRTARRRYTRRNRYCYLQEIFSNEMAKVDDSDFFHRLSEESFLVEEDKKHERHPFIGNIVDEV<br/> AYHEKYPTIYHLRKKLVDSTDKADLRLLYLALAHMIKFRGHFLIEGDLNPDNSDVKLFIQLVQTYNQLFEENPINASGVDAKAILSARLSKSR<br/> RLENLIAQLPGEKKNLFGNLIALLSLGTPNFKSNFDLAEDAKLQLSKDYDDDLNDLLAQIGDQYADLFLAAKNLSDAILSDILRVNTEITKA<br/> PLSASMIKRYDEHHQDLTLLKALVRQQLPEKYKEIFFDQSKNGYAGYIDGGASQEEFYKFIKPILEKMDGTEELLVKLNREDLLRQRTFDNG<br/> SIPHQIHLGELHAILRRQEDFYPLKDNREKIEKILTRIPYYVGPLARGNSRFAMWTRKSEETITPWNFEVVDKGASQAQSFIERMTNFDKN<br/> LPNEKVLPHKSHLLYEFTVYNELTKVKYVTEGMRKPAFLSGEQKKAIVDLLFKTRNKVTVKQLKEDYFKKIECLSYETEILTVEYGLLPIGKIVEK<br/> RIECTVYSDNNGNIYQTPVAQWHDGRGEQVEFYCLEGSLIRATKDHKFMTVDGQMLPIDEIFERELDLMRVDNLPN*</p>    |
| <p><b>N-int-ABE8e/-dCas:</b> NLS - TadA8e - linker - N-term-nCas9 - DnaE Npu N-intein</p> <p>MKRTADGSEFESPKKKRKVSEVEFSHEYWMRHALTLAKRARDEREVPVGA VLVHNNRVIGEGWNRPIGRHDPTAHAEIMALRQGGLV<br/> MQNYRLIDATLYVTLEPCVMCAGAMIHSRIGRVVFGVNRNSRGAAGSLMNVLYNPGMNHRVEITEGILADECAALLCDFYRMPRQVFNAQ<br/> KKAQSSINSGSSGGSSGSETPGTSESATPESSGGSSGSSSEVEFSHEYWMRHALTLAKRARDEREVPVGA VLVHNNRVIGEGWNRPIGR<br/> HDPTAHAEIMALRQGGLVMQNYRLIDATLYVTLEPCVMCAGAMIHSRIGRVVFGVNRNAKTGAAGSLMDVLHHPGMNHRVEITEGILADECA<br/> ALLCYFFRMPRQVFNAQKKAQSSTDSSGSSGGSSGSETPGTSESATPESSGGSSGSSDKKYSIGLDIGTNSVGWAVITDEYKVPKSKF<br/> VLGNTDRHSIKKNLIGALLFDSGETAEATRLKRTARRRYTRRNRYCYLQEIFSNEMAKVDDSDFFHRLSEESFLVEEDKKHERHPFIGNIVDEVA<br/> YHEKYPTIYHLRKKLVDSTDKADLRLLYLALAHMIKFRGHFLIEGDLNPDNSDVKLFIQLVQTYNQLFEENPINASGVDAKAILSARLSKSRRL<br/> ENLIAQLPGEKKNLFGNLIALLSLGTPNFKSNFDLAEDAKLQLSKDYDDDLNDLLAQIGDQYADLFLAAKNLSDAILSDILRVNTEITKAPL<br/> SASMIKRYDEHHQDLTLLKALVRQQLPEKYKEIFFDQSKNGYAGYIDGGASQEEFYKFIKPILEKMDGTEELLVKLNREDLLRQRTFDNGSI<br/> PHQIHLGELHAILRRQEDFYPLKDNREKIEKILTRIPYYVGPLARGNSRFAMWTRKSEETITPWNFEVVDKGASQAQSFIERMTNFDKNLP<br/> NEKVLPHKSHLLYEFTVYNELTKVKYVTEGMRKPAFLSGEQKKAIVDLLFKTRNKVTVKQLKEDYFKKIECLSYETEILTVEYGLLPIGKIVEKRIE<br/> CTVYSDNNGNIYQTPVAQWHDGRGEQVEFYCLEGSLIRATKDHKFMTVDGQMLPIDEIFERELDLMRVDNLPN*</p>          |
| <p><b>C-int-ABEmax/ABE8e:</b> DnaE Npu C-intein -C-term-nCas9, NLS-(GSG-P2A)-tagRFP</p> <p>MIKIATRKYLGKQNVYDIGVERDHNFALKNGFIASCDFSVEISGVEDRFNASLGTYHDLKIIKDKDFLDNEENEDILEDIVLTLTLFEDREMIE<br/> ERLKYAHLFDKVMKQLKRRRYTGWGRLSRKLINGIRDKQSGKTILDFLKSDFANRNFMLIHDSDLTFKEDIQKAQVSGQDLSLHEHI<br/> ANLAGSPAIKKILQTVKVVDELVKVMGRHKPENIVIAMARENQTTQKQKNSRERMKRIEEGIKELGSQILKEHPVENTQLQNEKLYLYYL<br/> QNGRDMYVDQELDINRLSDYDVAIVPQSLKDDSIDNKVLRSDKNRGKSDNVPSEEVKMKMKNYWRQLLNAKLITQRKFDNLTKAER<br/> GGLSELDKAGFIKRLVETRQITKHVAQILDSRMNTKYDENDKLIREVKITLKSCLVDFRKFDFQYKRVREINNYHHAHDAYLNAVVGTAI<br/> KKYPKLESEFVYGDYKVVDRKMIKSEQEI GKATAKYFFYSNIMNFFKTEITLANGEIRKRPLIETNGETGEIVWDKGRDFATVRKVL SMPQ<br/> VNIVKKEVQTTGGFSKESILPKRNSDKLIARCKDWDPKKYGGFDSPTVAYSVLVAKVEKGSKKLKSVKELLGITIMERSSEFNPIDFLEAK<br/> GYKEVKKDLIILPKYSLFELENGRKRMLASAGELQKGNELALPSKYVNFYLAHYEKLKGSPEDEQKQFVEQHKHYLDEIEIQISEFSKRV<br/> ILADANLDKVLSAYNKHRDKPIREQAENIIHLFTLNLGAPAAFKYDFTTIDRKRYTSTKEVLDATLIHQSI TGLYETRIDLSQLGGDSGSKRT<br/> ADGSEFE PKKKRKV GSGATNFSLKQAGDVEENPGP MVSKEELIKENMHMKLYMEGTVNHHFKCTSEGEKPYEGTQTMRIKVVVEG<br/> GPLPFAFDILATSFMYGSRFTINHTQGIPDFKQSFPEGFTWERVTTYEDGGVLTATQDTSLQDGLIYNVKIRGVNFPNPGVPMQKKTGLG<br/> WEANTEMLYPADGGLEGRSDMALKLVGGGHLICNFKTTYRSKPKAKNLKMPGVVYVDHRLRIEADKETYVEQHEVA VARYCDLPSKL<br/> GHKLN*</p>  |
| <p><b>C-int-ABEmax/ABE8e-dCas:</b> DnaE Npu C-intein -C-term-nCas9, NLS-(GSG-P2A)-tagRFP</p> <p>MIKIATRKYLGKQNVYDIGVERDHNFALKNGFIASCDFSVEISGVEDRFNASLGTYHDLKIIKDKDFLDNEENEDILEDIVLTLTLFEDREMIE<br/> ERLKYAHLFDKVMKQLKRRRYTGWGRLSRKLINGIRDKQSGKTILDFLKSDFANRNFMLIHDSDLTFKEDIQKAQVSGQDLSLHEHI<br/> ANLAGSPAIKKILQTVKVVDELVKVMGRHKPENIVIAMARENQTTQKQKNSRERMKRIEEGIKELGSQILKEHPVENTQLQNEKLYLYYL<br/> QNGRDMYVDQELDINRLSDYDVAIVPQSLKDDSIDNKVLRSDKNRGKSDNVPSEEVKMKMKNYWRQLLNAKLITQRKFDNLTKAER<br/> GGLSELDKAGFIKRLVETRQITKHVAQILDSRMNTKYDENDKLIREVKITLKSCLVDFRKFDFQYKRVREINNYHHAHDAYLNAVVGTAI<br/> KKYPKLESEFVYGDYKVVDRKMIKSEQEI GKATAKYFFYSNIMNFFKTEITLANGEIRKRPLIETNGETGEIVWDKGRDFATVRKVL SMPQ<br/> VNIVKKEVQTTGGFSKESILPKRNSDKLIARCKDWDPKKYGGFDSPTVAYSVLVAKVEKGSKKLKSVKELLGITIMERSSEFNPIDFLEAK<br/> GYKEVKKDLIILPKYSLFELENGRKRMLASAGELQKGNELALPSKYVNFYLAHYEKLKGSPEDEQKQFVEQHKHYLDEIEIQISEFSKRV<br/> ILADANLDKVLSAYNKHRDKPIREQAENIIHLFTLNLGAPAAFKYDFTTIDRKRYTSTKEVLDATLIHQSI TGLYETRIDLSQLGGDSGSSGSE<br/> FE PKKKRKV GSGATNFSLKQAGDVEENPGP MVSKEELIKENMHMKLYMEGTVNHHFKCTSEGEKPYEGTQTMRIKVVVEGGPLPF<br/> AFDILATSFMYGSRFTINHTQGIPDFKQSFPEGFTWERVTTYEDGGVLTATQDTSLQDGLIYNVKIRGVNFPNPGVPMQKKTGLGWEAN<br/> TEMLYPADGGLEGRSDMALKLVGGGHLICNFKTTYRSKPKAKNLKMPGVVYVDHRLRIEADKETYVEQHEVA VARYCDLPSKLGHKLN<br/> *</p> |

## Supplementary Note 2 | Javascript code for evaluation of the highest A to G conversion within the protospacer

```
const fs = require("fs");

// Configuration

const NON_REVERSE_COMPLEMENT_GUIDE = "CACATATTTTGAAGCAACGG";
const REVERSE_COMPLEMENT = false;
const filename =
  "Nucleotide_percentage_summary_around_sgRNA_CACATATTTTGAAGCAACGG.txt";

// Code (do not need to modify)

const complement = (str) =>
  str
    .split("")
    .map((s) => {
      if (s === "T") {
        return "A";
      } else if (s === "A") {
        return "T";
      } else if (s === "C") {
        return "G";
      } else if (s === "G") {
        return "C";
      }
    })
    .join("");

const createGuide = (str) => (c) => {
  if (c) {
    return complement(str).split("").reverse().join("");
  } else {
    return str;
  }
};

const GUIDE = createGuide(NON_REVERSE_COMPLEMENT_GUIDE)(REVERSE_COMPLEMENT);

const REFERENCE_BASE = createGuide("A")(REVERSE_COMPLEMENT);
```

```

const EDIT_BASE = createGuide("G")(REVERSE_COMPLEMENT);

let data = [];
// use const if the variable never changes and us let if you change it

const create2DArray = (w, h) => {
  let array = new Array(w);
  for (let i = 0; i < w; i++) {
    array[i] = new Array(h);
  }
  return array;
};

fs.readFile(filename, "utf8", (err, string) => {
  const rows = string.split("\n");
  data = create2DArray(rows.length, rows[0].split("\t").length);

  rows.forEach((r, ir) => {
    const columns = r.split("\t");

    columns.forEach((c, cr) => {
      data[ir][cr] = c;
    });
  });

  let startIndex = 2;
  let index = 0;

  let done = false;

  const header = data[0];

  while (!done) {
    if (index > GUIDE.length - 1) {
      done = true;
    } else {
      if (GUIDE[index] === header[startIndex + index]) {
        index += 1;
      } else {
        index = 0;
      }
    }
  }
}

```

```

startIndex += 1;

if (startIndex > data[0].length - 1) {
  console.log("GUIDE Not Found");
  return;
}
}
}
}

data.forEach((r => {
  if (r[1] === EDIT_BASE) {
    const sliced = r.slice(startIndex, startIndex + GUIDE.length);
    const t = sliced.reduce(
      (acc, v, i) => (GUIDE[i] === REFERENCE_BASE ? acc + Number(v) : acc),
      0
    );

    console.log(`${r[0]}:`, t);
  }
});
});

```



**Supplementary Note 3 | Uncropped Western Blot analysis images and PCR Agarose gel images.** Top panel: Western blot analysis of data shown in Suppl. Fig. S2. Mouse sgRNAs were tested for the knockdown of PCSK9 in Hepa1-6 cells. (sgRNA1-SD = sgRNA-mP01). Western blot analysis was performed three times for n = 3 biologically independent replicates. Bottom panel: Uncropped gel images of Suppl. Fig. S8.

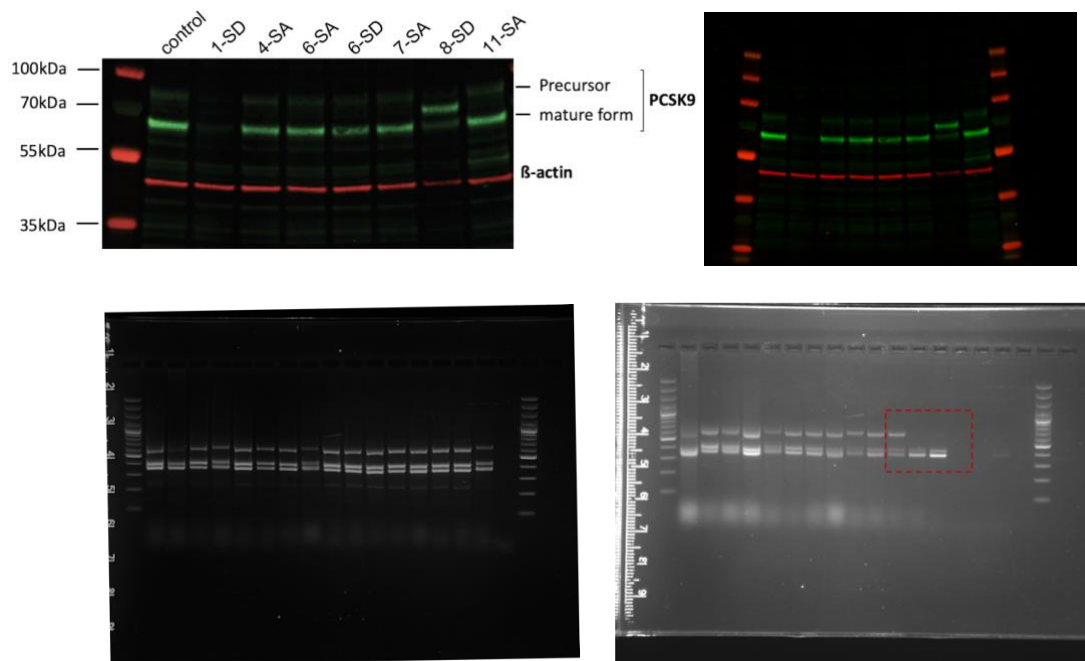

### Supplementary References

1. Grünewald, J. *et al.* Transcriptome-wide off-target RNA editing induced by CRISPR-guided DNA base editors. *Nature* (2019). doi:10.1038/s41586-019-1161-z
2. Marquart, K. F. *et al.* Predicting base editing outcomes with an attention-based deep learning algorithm trained on high-throughput target library screens. *bioRxiv* 2020.07.05.186544 (2020). doi:10.1101/2020.07.05.186544
3. Lazzarotto, C. R. *et al.* CHANGE-seq reveals genetic and epigenetic effects on CRISPR–Cas9 genome-wide activity. *Nat. Biotechnol.* (2020). doi:10.1038/s41587-020-0555-7
